# Supplementary material
Source: PubMed Central journal article supplement (PMC3875235)
Supplement: NIHMS448097-supplement-Supplementary_Info.pdf [file NIHMS448097-supplement-Supplementary_Info.pdf]

---

# Fast, Exact Model Selection and Permutation Testing for $\ell_2$ -Regularized Logistic Regression

---

**Bryan Conroy**  
Columbia University  
New York, NY  
bc2468@columbia.edu

**Paul Sajda**  
Columbia University  
New York, NY  
psajda@columbia.edu

## 1 APPENDIX - SUPPLEMENTARY MATERIAL

*Proof.* (Lemma 1): Given the linear system  $A_p w_p = X m_p$ , with  $A_p = X R_p X^T + C$  and  $X = QZ$ . Let the columns of  $Q^\perp$  span the orthogonal complement of  $\text{range}(Q)$ . Then we have:

$$\begin{aligned} Q^{\perp T} (X R_p X^T + C) w_p &= Q^{\perp T} X m_p & (1) \\ Q^{\perp T} C w_p &= 0 & (2) \end{aligned}$$

This implies that  $C w_p \in \text{range}(Q)$ , so that  $w_p \in \text{range}(C^{-1}Q)$ .  $\square$

*Proof.* (Lemma 2): Let  $U = [Q, W]$  be a matrix with orthonormal columns that is a basis for  $\text{range}([Q, C^{-1}Q])$ . From Lemma 1, we know that the solution  $w_p$  to  $A w_p = X m_p$  satisfies  $w_p \in \text{range}(U)$ . Thus, write  $w_p$  as:

$$w_p = Q \tilde{w}_p + W \alpha_p \quad (3)$$

Then we may factorize  $A_p w_p = X m_p$  as:

$$\begin{aligned} U^T (X R_p X^T + C) U \begin{bmatrix} \tilde{w}_p \\ \alpha_p \end{bmatrix} &= U^T X m_p \\ \begin{bmatrix} Z R_p Z^T + Q^T C Q & Q^T C W \\ W^T C Q & W^T C W \end{bmatrix} \begin{bmatrix} \tilde{w}_p \\ \alpha_p \end{bmatrix} &= \begin{bmatrix} Z \\ 0 \end{bmatrix} m_p \end{aligned}$$

The above may be separated into two systems of linear equations:

$$\begin{aligned} (Z R_p Z^T + Q^T C Q) \tilde{w}_p + Q^T C W \alpha_p &= Z m_p & (4) \\ W^T C Q \tilde{w}_p + W^T C W \alpha_p &= 0 & (5) \end{aligned}$$

Using the second system of equations to solve for  $\alpha_p$  in terms of  $\tilde{w}_p$  yields:

$$\alpha_p = -F \tilde{w}_p \quad (6)$$

where  $F = -(W^T C W)^{-1} W^T C Q$ .

Substituting (6) into (4) yields:

$$\tilde{A}_p \tilde{w}_p = Z m_p \quad (7)$$

where  $\tilde{A}_p = Z R_p Z^T + \tilde{C}$  and  $\tilde{C} = Q^T C Q - Q^T C W F$ .

After solving (7) for  $\tilde{w}_p$ , and using (3) and (6),  $w_p$  may be computed as:

$$\begin{aligned} w_p &= Q \tilde{w}_p + W \alpha_p \\ &= (Q - W F) \tilde{w}_p \end{aligned}$$

$\square$
